# Supplementary material
Source: PubMed Central journal article supplement (PMC6545888)
Supplement: NIHMS1527783-supplement-1.pdf [file NIHMS1527783-supplement-1.pdf]

### ***Supplementary Table 1: Detailed scoring of exemplary DNT tests for readiness***

Detailed scoring of the test methods summarized in Table 3. Each of the test methods were scored according to the criteria in Table 2. In the first column the short form of the criteria as in Table 2 are given. The next columns contain the scores for all the given test methods as detailed in the header of the columns. The bold interim lines give the sum of the scores for each of the 13 main categories. This score was then summarized in Table 3. UKN1 - PSC differentiation into NPC/NSC, NPC1 – hNPC proliferation, NPC2 – hNPC migration, NPC3 – hNPC neuronal differentiation, NPC4 – hNPC differentiated neurons, NPC5 – hNPC oligodendrocyte differentiation, NPC6 – hNPC oligodendrocyte maturation and TH disruption, UKN2 - NCC proliferation and migration, Embryonic phase, differentiation: MESn - Morphological ESC to neurons, Foetal phase: UKN4 (NeuriTox) –Neurite outgrowth, UKN5 (PeriTox) – Neurite outgrowth peripheral neurons, NSR neuronal subtype ratio Neuronal maturation: Syn – Synaptogenesis, Nnff – Neuronal Network formation and function, 3Dr - Astrocytes, Oligodendrocytes, Myelination, Microglia in 3D rat, 3Dh - Astrocytes, Oligodendrocytes, Myelination, Microglia in 3D human,ZFE - Zebrafish

| Criteria                                         | Max. score | UKN1      | NPC1      | NPC2       | NPC3       | NPC4       | NPC5       | NPC6       | UKN2     | MESn       | UKN4<br>NeuriTox | UKN5<br>PeriTox | NSR        | SYN      | Nnff     | 3Dr       | 3Dh        | ZFE        |          |
|--------------------------------------------------|------------|-----------|-----------|------------|------------|------------|------------|------------|----------|------------|------------------|-----------------|------------|----------|----------|-----------|------------|------------|----------|
| <b>1 Test system</b>                             | <b>10</b>  | <b>10</b> | <b>10</b> | <b>10</b>  | <b>10</b>  | <b>10</b>  | <b>10</b>  | <b>10</b>  | <b>9</b> | <b>7</b>   | <b>10</b>        | <b>9</b>        | <b>4</b>   | <b>8</b> | <b>8</b> | <b>10</b> | <b>7</b>   | <b>8</b>   |          |
| 1a What is modelled                              | 1          | 1         | 1         | 1          | 1          | 1          | 1          | 1          | 1        | 1          | 1                | 1               | 1          | 1        | 1        | 1         | 1          | 1          |          |
| 1b Relevance                                     | 1          | 1         | 1         | 1          | 1          | 1          | 1          | 1          | 1        | 1          | 1                | 1               | 1          | 1        | 1        | 1         | 1          | 1          |          |
| 1c System uncertainties and human correlate (HC) | 1          | 1         | 1         | 1          | 1          | 1          | 1          | 1          | 0        | 0          | 1                | 0               | 0          | 0        | 0.5      | 1         | 1          | 1          |          |
| 1d Definition of cells                           | 1          | 1         | 1         | 1          | 1          | 1          | 1          | 1          | 1        | 1          | 1                | 1               | 0          | 1        | 1        | 1         | 1          | 1          |          |
| 1e Cell composition                              | 1          | 1         | 1         | 1          | 1          | 1          | 1          | 1          | 1        | 0.5        | 1                | 1               | 1          | 1        | 1        | 1         | 1          | 1          |          |
| 1f Cellular environment                          | 1          | 1         | 1         | 1          | 1          | 1          | 1          | 1          | 1        | 1          | 1                | 1               | 0          | 1        | 1        | 1         | 1          | 1          |          |
| 1g Biological consistency                        | 1          | 1         | 1         | 1          | 1          | 1          | 1          | 1          | 1        | 0.5        | 1                | 1               | 0          | 1        | 0.5      | 1         | 0          | 0          |          |
| 1h Critical components                           | 1          | 1         | 1         | 1          | 1          | 1          | 1          | 1          | 1        | 0.5        | 1                | 1               | 0          | 1        | 1        | 1         | 0          | 0          |          |
| 1i Cell stability                                | 1          | 1         | 1         | 1          | 1          | 1          | 1          | 1          | 1        | 0.5        | 1                | 1               | 0          | 1        | 1        | 1         | 0          | 1          |          |
| 1j <i>Transgenic cells</i>                       | 1          | 1         | 1         | 1          | 1          | 1          | 1          | 1          | 1        | 1          | 1                | 1               | 1          | 0        | 0        | 1         | 1          | 1          |          |
| <b>2 Exposure scheme</b>                         | <b>3</b>   | <b>3</b>  | <b>3</b>  | <b>3</b>   | <b>3</b>   | <b>3</b>   | <b>3</b>   | <b>3</b>   | <b>3</b> | <b>2.5</b> | <b>3</b>         | <b>3</b>        | <b>1</b>   | <b>3</b> | <b>3</b> | <b>3</b>  | <b>3</b>   | <b>3</b>   |          |
| 2a Description                                   | 1          | 1         | 1         | 1          | 1          | 1          | 1          | 1          | 1        | 1          | 1                | 1               | 0          | 1        | 1        | 1         | 1          | 1          |          |
| 2b Unique identity                               | 1          | 1         | 1         | 1          | 1          | 1          | 1          | 1          | 1        | 0.5        | 1                | 1               | 0          | 1        | 1        | 1         | 1          | 1          |          |
| 2c Graphical scheme                              | 1          | 1         | 1         | 1          | 1          | 1          | 1          | 1          | 1        | 1          | 1                | 1               | 1          | 1        | 1        | 1         | 1          | 1          |          |
| <b>3 Documentation / SOP</b>                     | <b>5</b>   | <b>3</b>  | <b>5</b>  | <b>4.5</b> | <b>4.5</b> | <b>4.5</b> | <b>4.5</b> | <b>4.5</b> | <b>5</b> | <b>0.5</b> | <b>5</b>         | <b>5</b>        | <b>3.5</b> | <b>3</b> | <b>3</b> | <b>5</b>  | <b>2</b>   | <b>4</b>   |          |
| 3a <i>Availability</i>                           | 1          | 1         | 1         | 1          | 1          | 1          | 1          | 1          | 1        | 0.5        | 1                | 1               | 1          | 1        | 1        | 1         | 0          | 1          |          |
| 3b Stage of development                          | 1          | 0         | 1         | 1          | 1          | 1          | 1          | 1          | 1        | 0          | 1                | 1               | 1          | 0        | 0        | 1         | 0          | 0          |          |
| 3c <i>For CRO tests</i>                          | 1          | 1         | 1         | 1          | 1          | 1          | 1          | 1          | 1        | 0          | 1                | 1               | 1          | 0        | 0.5      | 1         | 0          | 1          |          |
| 3d Test components                               | 1          | 0         | 1         | 1          | 1          | 1          | 1          | 1          | 1        | 0          | 1                | 1               | 0          | 1        | 1        | 1         | 1          | 1          |          |
| 3e Stocks                                        | 1          | 1         | 1         | 0.5        | 0.5        | 0.5        | 0.5        | 0.5        | 0.5      | 1          | 0                | 1               | 1          | 0.5      | 1        | 0.5       | 1          | 1          |          |
| <b>4 Main endpoint(s)</b>                        | <b>4</b>   | <b>4</b>  | <b>4</b>  | <b>4</b>   | <b>4</b>   | <b>4</b>   | <b>4</b>   | <b>4</b>   | <b>4</b> | <b>2.5</b> | <b>4</b>         | <b>4</b>        | <b>3</b>   | <b>4</b> | <b>4</b> | <b>4</b>  | <b>4</b>   | <b>3</b>   | <b>3</b> |
| 4a Biol. relevance                               | 1          | 1         | 1         | 1          | 1          | 1          | 1          | 1          | 1        | 1          | 1                | 1               | 1          | 1        | 1        | 1         | 1          | 1          |          |
| 4b Toxicol. relevance                            | 1          | 1         | 1         | 1          | 1          | 1          | 1          | 1          | 1        | 1          | 1                | 1               | 1          | 1        | 1        | 1         | 1          | 1          |          |
| 4c Analytical methods                            | 1          | 1         | 1         | 1          | 1          | 1          | 1          | 1          | 1        | 0          | 1                | 1               | 1          | 1        | 1        | 1         | 0          | 0          |          |
| 4d Multiple endpoints                            | 1          | 1         | 1         | 1          | 1          | 1          | 1          | 1          | 1        | 0.5        | 1                | 1               | 0          | 1        | 1        | 1         | 1          | 1          |          |
| <b>5 Cytotoxicity</b>                            | <b>5</b>   | <b>4</b>  | <b>4</b>  | <b>4.5</b> | <b>4</b>   | <b>4</b>   | <b>4</b>   | <b>4</b>   | <b>5</b> | <b>1</b>   | <b>5</b>         | <b>5</b>        | <b>3</b>   | <b>2</b> | <b>3</b> | <b>4</b>  | <b>2.5</b> | <b>3.5</b> |          |
| 5a Cytotoxicity within test                      | 1          | 1         | 1         | 1          | 1          | 1          | 1          | 1          | 1        | 0          | 1                | 1               | 1          | 0.5      | 1        | 1         | 1          | 1          |          |
| 5b Subpopulation effects                         | 0.5        | 0         | 0         | 0.5        | 0          | 0          | 0          | 0          | 0.5      | 0          | 0.5              | 0.5             | 1          | 0        | 0        | 0         | 0          | 0.5        |          |
| 5c Specificity (compared to cytotox)             | 0.5        | 0.5       | 0.5       | 0.5        | 0.5        | 0.5        | 0.5        | 0.5        | 0.5      | 0          | 0.5              | 0.5             | 0          | 0.5      | 0.5      | 0.5       | 0.5        | 0          |          |
| 5d <i>Timing within test</i>                     | 0.5        | 0.5       | 0.5       | 0.5        | 0.5        | 0.5        | 0.5        | 0.5        | 0.5      | 0          | 0.5              | 0.5             | 0          | 0        | 0.25     | 0.5       | 0          | 0.5        |          |
| 5e <i>Timing after test</i>                      | 0.5        | 0.5       | 0.5       | 0.5        | 0.5        | 0.5        | 0.5        | 0.5        | 0.5      | 0.5        | 0.5              | 0.5             | 0          | 0        | 0.25     | 0.5       | 0          | 0.5        |          |
| 5f Curve fitting                                 | 0.5        | 0.5       | 0.5       | 0.5        | 0.5        | 0.5        | 0.5        | 0.25       | 0.5      | 0          | 0.5              | 0.5             | 0.5        | 0.5      | 0.5      | 0.5       | 0          | 0          |          |
| 5g Non-cytotoxicity                              | 0.5        | 0         | 0.25      | 0.25       | 0          | 0          | 0          | 0          | 0.5      | 0          | 0.5              | 0.5             | 0.5        | 0.5      | 0.25     | 0         | 0          | 0          |          |
| 5h Bench mark response                           | 0.5        | 0.5       | 0.25      | 0.25       | 0.5        | 0.5        | 0.5        | 0.5        | 0.5      | 0          | 0.5              | 0.5             | 0          | 0        | 0.25     | 0.5       | 0.5        | 0.5        |          |
| 5i <i>Apoptosis/ Proliferation</i>               | 0.5        | 0.5       | 0.5       | 0.5        | 0.5        | 0.5        | 0.5        | 0.5        | 0.5      | 0.5        | 0.5              | 0.5             | 0          | 0        | 0        | 0.5       | 0.5        | 0.5        |          |
| <b>6 Test method controls</b>                    | <b>4</b>   | <b>4</b>  | <b>4</b>  | <b>4</b>   | <b>4</b>   | <b>1.5</b> | <b>4</b>   | <b>3.5</b> | <b>4</b> | <b>0</b>   | <b>4</b>         | <b>4</b>        | <b>0</b>   | <b>1</b> | <b>3</b> | <b>4</b>  | <b>0</b>   | <b>2</b>   |          |
| 6a Positive controls (PC)                        | 1          | 1         | 1         | 1          | 1          | 0.5        | 1          | 1          | 1        | 0          | 1                | 1               | 0          | 1        | 1        | 1         | 0          | 1          |          |

|                                    |          |          |          |          |          |            |            |            |          |            |          |          |          |          |            |          |          |          |
|------------------------------------|----------|----------|----------|----------|----------|------------|------------|------------|----------|------------|----------|----------|----------|----------|------------|----------|----------|----------|
| 6b Negative controls (NC)          | 1        | 1        | 1        | 1        | 1        | 0          | 1          | 0.5        | 1        | 0          | 1        | 1        | 0        | 0        | 0.5        | 1        | 0        | 0        |
| 6c Unspecific controls (UC)        | 1        | 1        | 1        | 1        | 1        | 1          | 1          | 1          | 1        | 0          | 1        | 1        | 0        | 0        | 0.5        | 1        | 0        | 0        |
| 6d Endpoint-specific controls (EC) | 1        | 1        | 1        | 1        | 1        | 0          | 1          | 1          | 1        | 0          | 1        | 1        | 0        | 0        | 1          | 1        | 0        | 1        |
| <b>7 Data evaluation</b>           | <b>4</b> | <b>3</b> | <b>3</b> | <b>3</b> | <b>3</b> | <b>3</b>   | <b>3</b>   | <b>2</b>   | <b>4</b> | <b>0.5</b> | <b>4</b> | <b>3</b> | <b>1</b> | <b>1</b> | <b>2.5</b> | <b>4</b> | <b>2</b> | <b>3</b> |
| 7a Outliers                        | 1        | 1        | 1        | 1        | 1        | 1          | 1          | 1          | 1        | 0.5        | 1        | 0        | 0        | 0        | 0.5        | 1        | 0        | 1        |
| 7b Conc.-dependence                | 1        | 1        | 1        | 1        | 1        | 1          | 1          | 1          | 1        | 0          | 1        | 1        | 1        | 1        | 1          | 1        | 1        | 0        |
| 7c Benchmark response              | 1        | 0        | 0        | 0        | 0        | 0          | 0          | 0          | 1        | 0          | 1        | 1        | 0        | 0        | 0.5        | 1        | 1        | 1        |
| 7d Curve fitting                   | 1        | 1        | 1        | 1        | 1        | 1          | 1          | 0          | 1        | 0.5        | 1        | 1        | 0        | 0        | 0.5        | 1        | 0        | 1        |
| <b>8 Testing strategy</b>          | <b>4</b> | <b>3</b> | <b>4</b> | <b>4</b> | <b>4</b> | <b>4</b>   | <b>4</b>   | <b>4</b>   | <b>3</b> | <b>0</b>   | <b>4</b> | <b>3</b> | <b>1</b> | <b>4</b> | <b>4</b>   | <b>4</b> | <b>4</b> | <b>3</b> |
| 8a Hazard prediction               | 1        | 1        | 1        | 1        | 1        | 1          | 1          | 1          | 1        | 0          | 1        | 1        | 0        | 1        | 1          | 1        | 1        | 1        |
| 8b Link to an AOP                  | 1        | 1        | 1        | 1        | 1        | 1          | 1          | 1          | 1        | 0          | 1        | 0        | 0        | 1        | 1          | 1        | 1        | 0        |
| 8c Role in battery                 | 1        | 0        | 1        | 1        | 1        | 1          | 1          | 1          | 1        | 0          | 1        | 1        | 1        | 1        | 1          | 1        | 1        | 1        |
| 8d Comparison to similar tests     | 1        | 1        | 1        | 1        | 1        | 1          | 1          | 1          | 1        | 0          | 1        | 1        | 0        | 1        | 1          | 1        | 1        | 1        |
| <b>9 Robustness</b>                | <b>4</b> | <b>3</b> | <b>3</b> | <b>4</b> | <b>4</b> | <b>4</b>   | <b>3</b>   | <b>2.5</b> | <b>3</b> | <b>0</b>   | <b>3</b> | <b>3</b> | <b>1</b> | <b>2</b> | <b>3.5</b> | <b>4</b> | <b>0</b> | <b>2</b> |
| 9a Reproducibility                 | 1        | 1        | 1        | 1        | 1        | 1          | 1          | 1          | 1        | 0          | 1        | 1        | 1        | 1        | 1          | 1        | 0        | 1        |
| 9b Intra-lab                       | 1        | 1        | 1        | 1        | 1        | 1          | 1          | 1          | 1        | 0          | 1        | 1        | 0        | 0        | 1          | 1        | 0        | 1        |
| 9c Inter-lab                       | 1        | 0        | 0        | 1        | 1        | 1          | 0          | 0          | 0        | 0          | 0        | 0        | 0        | 0        | 1          | 1        | 0        | 0        |
| 9d Historical controls             | 1        | 1        | 1        | 1        | 1        | 1          | 1          | 0.5        | 1        | 0          | 1        | 1        | 0        | 1        | 0.5        | 1        | 0        | 0        |
| <b>10 Test benchmarks</b>          | <b>4</b> | <b>3</b> | <b>4</b> | <b>4</b> | <b>4</b> | <b>0.5</b> | <b>2.5</b> | <b>1.5</b> | <b>4</b> | <b>0</b>   | <b>4</b> | <b>4</b> | <b>0</b> | <b>1</b> | <b>3</b>   | <b>3</b> | <b>0</b> | <b>3</b> |
| 10a Sensitivity (of the test)      | 1        | 0        | 1        | 1        | 1        | 0.5        | 0          | 0          | 1        | 0          | 1        | 1        | 0        | 0        | 1          | 1        | 0        | 0        |
| 10b Specificity (of the test)      | 1        | 1        | 1        | 1        | 1        | 0          | 0.5        | 0          | 1        | 0          | 1        | 1        | 0        | 0        | 1          | 1        | 0        | 1        |
| 10c Acceptance criteria            | 1        | 1        | 1        | 1        | 1        | 0          | 1          | 1          | 1        | 0          | 1        | 1        | 0        | 0        | 0.5        | 1        | 0        | 1        |
| 10d Response characteristics       | 1        | 1        | 1        | 1        | 1        | 0          | 1          | 0.5        | 1        | 0          | 1        | 1        | 0        | 1        | 0.5        | 1        | 0        | 1        |
| <b>11 Prediction model</b>         | <b>4</b> | <b>2</b> | <b>2</b> | <b>3</b> | <b>3</b> | <b>0</b>   | <b>3</b>   | <b>3</b>   | <b>3</b> | <b>0</b>   | <b>4</b> | <b>2</b> | <b>0</b> | <b>0</b> | <b>2.5</b> | <b>4</b> | <b>0</b> | <b>1</b> |
| 11a Definition                     | 1        | 1        | 1        | 1        | 1        | 0          | 1          | 1          | 1        | 0          | 1        | 1        | 0        | 0        | 1          | 1        | 0        | 1        |
| 11b Rationale                      | 1        | 1        | 0.5      | 1        | 1        | 0          | 1          | 1          | 1        | 0          | 1        | 1        | 0        | 0        | 0.5        | 1        | 0        | 0        |
| 11c Confirmation                   | 1        | 0        | 0.5      | 1        | 1        | 0          | 1          | 1          | 0        | 0          | 1        | 0        | 0        | 0        | 0.5        | 1        | 0        | 0        |
| 11d Limitations                    | 1        | 0        | 0        | 0        | 0        | 0          | 0          | 0          | 1        | 0          | 1        | 0        | 0        | 0        | 0.5        | 1        | 0        | 0        |
| <b>12 Applicability domains</b>    | <b>3</b> | <b>2</b> | <b>2</b> | <b>3</b> | <b>3</b> | <b>3</b>   | <b>2.5</b> | <b>2.5</b> | <b>1</b> | <b>0</b>   | <b>3</b> | <b>1</b> | <b>0</b> | <b>3</b> | <b>2</b>   | <b>3</b> | <b>2</b> | <b>1</b> |
| 12a Chemicals                      | 1        | 1        | 0.5      | 1        | 1        | 1          | 0.5        | 0.5        | 1        | 0          | 1        | 1        | 0        | 1        | 0.5        | 1        | 1        | 1        |
| 12b Pathways                       | 1        | 1        | 0.5      | 1        | 1        | 1          | 1          | 1          | 0        | 0          | 1        | 0        | 0        | 1        | 0.5        | 1        | 0        | 0        |
| 12c AOP                            | 1        | 0        | 1        | 1        | 1        | 1          | 1          | 1          | 0        | 0          | 1        | 0        | 0        | 1        | 1          | 1        | 1        | 0        |
| <b>13 Screening hits</b>           | <b>4</b> | <b>3</b> | <b>3</b> | <b>3</b> | <b>2</b> | <b>1</b>   | <b>2</b>   | <b>2</b>   | <b>4</b> | <b>0</b>   | <b>3</b> | <b>3</b> | <b>0</b> | <b>2</b> | <b>2.5</b> | <b>4</b> | <b>1</b> | <b>4</b> |
| 13a Hit definition                 | 1        | 1        | 0        | 0        | 0        | 0          | 0          | 0          | 1        | 0          | 1        | 1        | 0        | 1        | 0.5        | 1        | 1        | 1        |
| 13b Hit confirmation (prim.)       | 1        | 1        | 1        | 1        | 1        | 0.5        | 1          | 1          | 1        | 0          | 1        | 1        | 0        | 1        | 0.5        | 1        | 0        | 1        |
| 13c Hit confirmation (sec.)        | 1        | 0        | 1        | 1        | 0        | 0          | 0          | 0          | 1        | 0          | 0        | 0        | 0        | 0        | 0.5        | 1        | 0        | 1        |
| 13d Screen documentation           | 1        | 1        | 1        | 1        | 1        | 0.5        | 1          | 1          | 1        | 0          | 1        | 1        | 0        | 0        | 1          | 1        | 0        | 1        |
